# Supplementary material
Source: PubMed Central journal article supplement (PMC8575536)
Supplement: mmc2.pdf [file mmc2.pdf]

**Supplementary Figure 1 Proportions of physical and psychological symptoms in “long COVID” syndrome**

**a) Population**

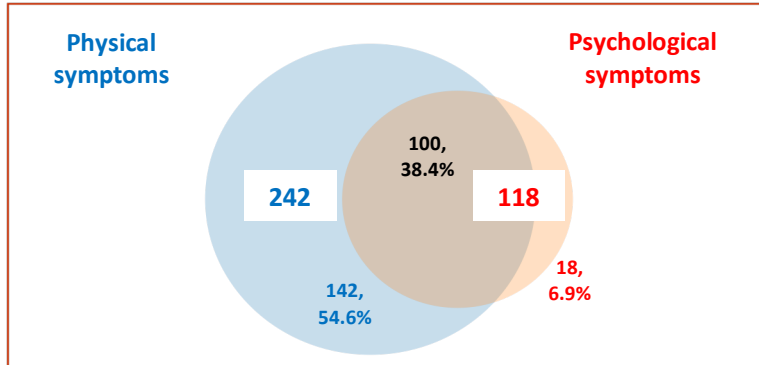

**b) Males**

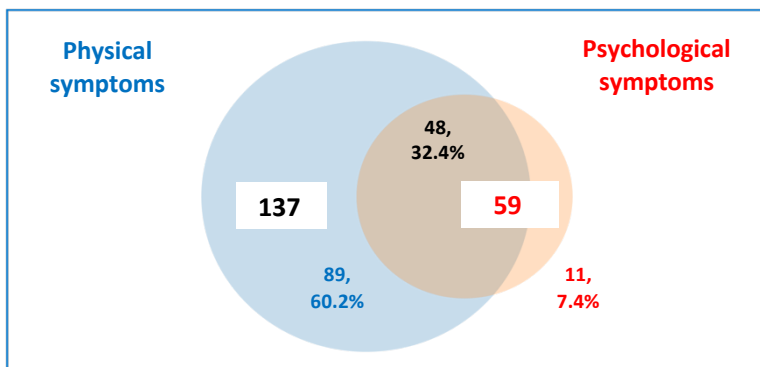

**c) Females**

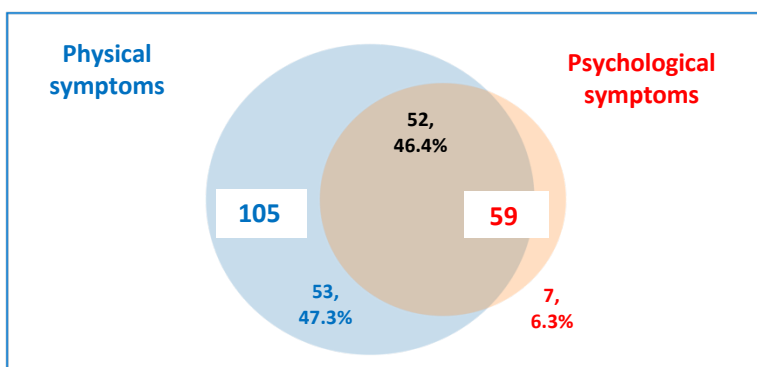

**LEGEND Venn diagram**

a) Study population; b) Males; c) Females. Physical symptoms: anosmia, dysgeusia, fever, gastrointestinal symptoms, dyspnea, fatigue, joint pain or myalgia, brain fog, other. Psychological symptoms: anxiety, depression and post-traumatic stress disorder. Comparison between men and women in physical and psychological symptoms: p value= 0.071.
